# Supplementary material for: Crotoxin Modulates Macrophage Phenotypic Reprogramming
Source: MDPI journal article supplement (doi:10.3390/toxins15100616), 2023-10-17
Supplement: s1 [file s1]

---

# Crotoxin Modulates Macrophage Phenotypic Reprogramming

Camila Lima Neves <sup>1</sup>, Christiano Marcello Vaz Barbosa <sup>2</sup>, Priscila Andrade Ranéia-Silva <sup>3</sup>,  
Eliana L. Faquim-Mauro <sup>4,5</sup> and Sandra Coccuzzo Sampaio <sup>1,6,\*</sup>

- <sup>1</sup> Laboratory of Pathophysiology, Butantan Institute, São Paulo 05503-900, Brazil; camila.neves@butantan.gov.br
- <sup>2</sup> Department of Biochemistry, Federal University of São Paulo, São Paulo 04044-020, Brazil; cmvbarbosa@unifesp.br
- <sup>3</sup> University of Ribeirão Preto, Campus Guarujá, São Paulo 11440-003, Brazil; parsilva@unaerp.br
- <sup>4</sup> Laboratory of Immunopathology, Butantan Institute, São Paulo 05503-900, Brazil; eliana.faquim@butantan.gov.br
- <sup>5</sup> Department of Immunology, Institute of Biomedical Sciences, University of São Paulo, São Paulo, 05508-220, Brazil;
- <sup>6</sup> Department of Pharmacology, Institute of Biomedical Sciences, University of São Paulo, São Paulo 05508-220, Brazil;
- \* Correspondence: sandra.coccuzzo@butantan.gov.br

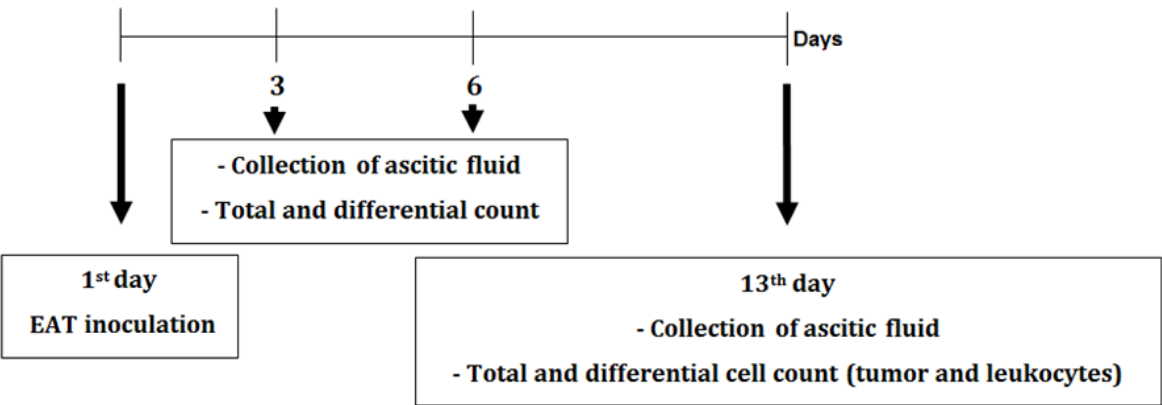

**Scheme S1.** Representative experimental scheme of the growth curve of the EAT.

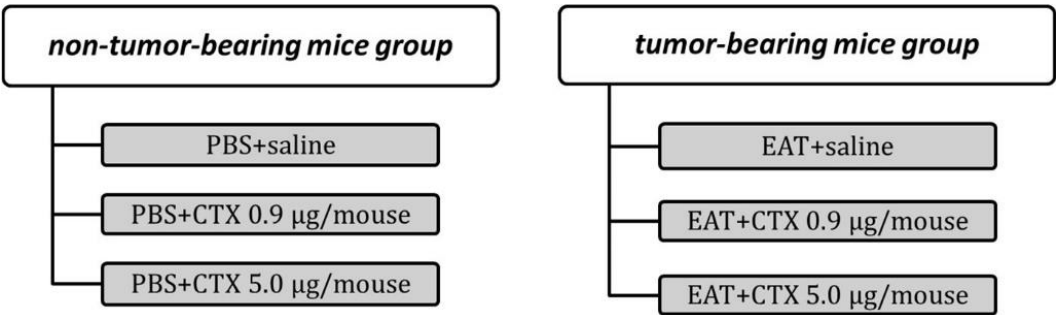

**Schema S2:** Representative scheme of the groups used in the experimental protocols.

---

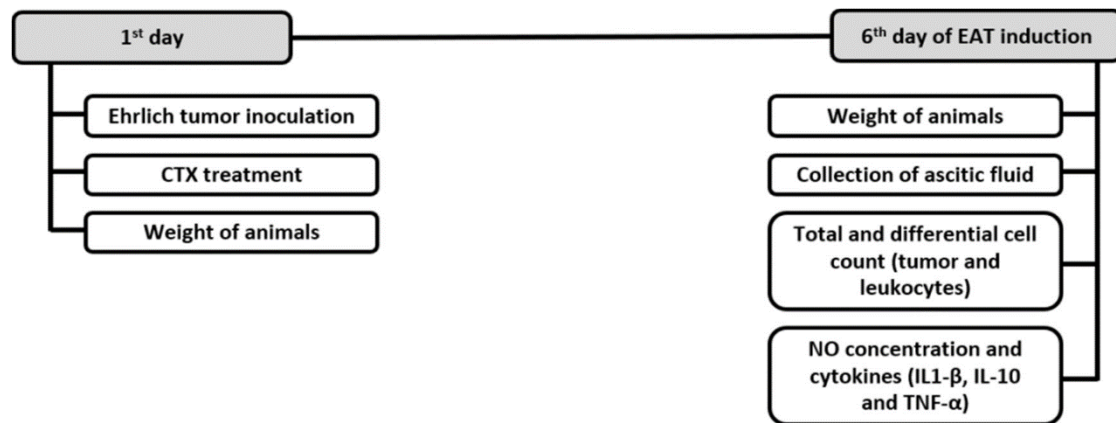

**Schema S3:** Representative scheme of the evaluation of different parameters on the 6<sup>th</sup> day of ascites development.

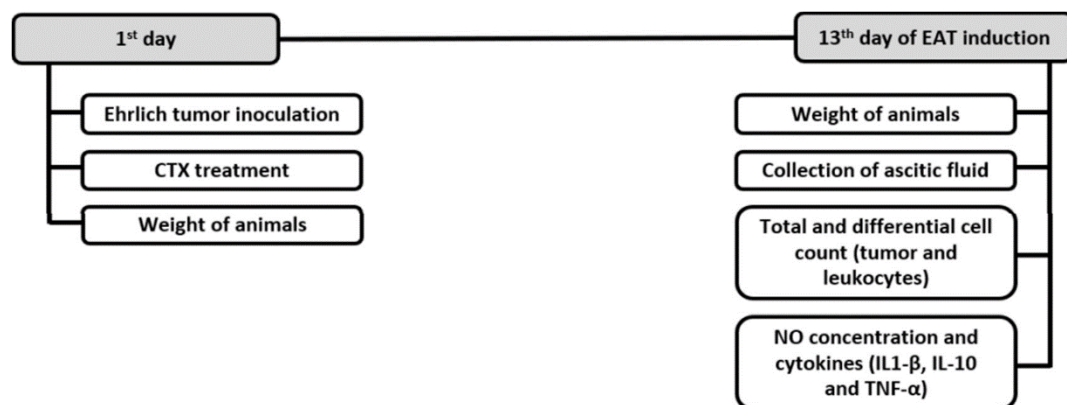

**Schema S4:** Representative scheme of the evaluation of different parameters on the 13<sup>th</sup> day of ascites development.

---
