# Supplementary material for: Crotoxin Modulates Macrophage Phenotypic Reprogramming
Source: MDPI journal article supplement (doi:10.3390/toxins15100616), 2023-10-17
Supplement: s1 [file s1]

| No tumor group  |                  |                   |                  |                  |                   |                |                  |                   | Tumor group     |                  |                   |                    |                  |                   |
|-----------------|------------------|-------------------|------------------|------------------|-------------------|----------------|------------------|-------------------|-----------------|------------------|-------------------|--------------------|------------------|-------------------|
| Body weight (g) |                  |                   |                  |                  |                   |                |                  |                   | Body weight (g) |                  |                   |                    |                  |                   |
| (PBS+Saline)    |                  |                   | (PBS+CTX 0.9 µg) |                  |                   | (PBS+CTX 5 µg) |                  |                   | (Tumor+Saline)  |                  |                   | (Tumor+CTX 0.9 µg) |                  |                   |
|                 | Weight (1st day) | Weight (13th day) |                  | Weight (1st day) | Weight (13th day) |                | Weight (1st day) | Weight (13th day) |                 | Weight (1st day) | Weight (13th day) |                    | Weight (1st day) | Weight (13th day) |
| Animal 1        | 29.12            | 29.12             | Animal 1         | 27.79            | 26.65             | Animal 1       | 23.97            | 23.73             | Animal 1        | 28.21            | 36.8              | Animal 1           | 29.54            | 34.21             |
| Animal 2        | 26.67            | 26.62             | Animal 2         | 26.98            | 28.19             | Animal 2       | 25.77            | 26.61             | Animal 2        | 26.75            | 35.49             | Animal 2           | 29.00            | 34.44             |
| Animal 3        | 28.66            | 28.89             | Animal 3         | 25.57            | 27.21             | Animal 3       | 23.78            | 24.49             | Animal 3        | 28.91            | 36.55             | Animal 3           | 26.49            | 33.59             |
| Animal 4        | 24.28            | 26.85             | Animal 4         | 24.29            | 27.55             | Animal 4       | 23.73            | 24.28             | Animal 4        | 24.27            | 31.49             | Animal 4           | 26.13            | 31.63             |
| Animal 5        | 24.36            | 28.64             | Animal 5         | 23.96            | 27.62             | Animal 5       | 24.27            | 25.13             | Animal 5        | 25.06            | 34.52             | Animal 5           | 25.65            | 33.64             |
| Animal 6        | 24.85            | 27.67             | Animal 6         |                  |                   | Animal 6       | 24.71            | 24.74             | Animal 6        | 24.75            | 32.28             | Animal 6           | 27.66            | 38.99             |
|                 |                  |                   |                  |                  |                   |                |                  |                   | Animal 7        | 25.95            | 36.11             | Animal 7           | 27.12            | 37.08             |
|                 |                  |                   |                  |                  |                   |                |                  |                   | Animal 8        | 26.03            | 35.16             | Animal 8           | 27.37            | 34.80             |

|                  |
|------------------|
|                  |
|                  |
| (Tumor+CTX 5 µg) |

|          | Weight (1st day) | Weight (13th day) |
|----------|------------------|-------------------|
| Animal 1 | 28.6             | 36.63             |
| Animal 2 | 28.19            | 36.79             |
| Animal 3 | 28.23            | 36.69             |
| Animal 4 | 25.51            | 36.46             |
| Animal 5 | 25.4             | 34.09             |
| Animal 6 | 26.81            | 37.66             |
| Animal 7 | 25.49            | 37.19             |
| Animal 8 | 26.53            | 35.79             |
